# Supplementary material for: Zr and Y co-doped perovskite as a stable, high performance cathode for solid oxide fuel cells operating below 500 °C
Source: Royal Society of Chemistry journal article supplement (doi:10.1039/c6ee01915c), 2016-10-10
Supplement: c6ee01915c1.pdf [file c6ee01915c1.pdf]

## Electronic Supplementary Information

### Zr and Y co-doped perovskite as a stable, high performance cathode for solid oxide fuel cells operating below 500 °C

Chuanheng Duan,<sup>a</sup> David Hook,<sup>b</sup> Yachao Chen,<sup>a</sup> Jianhua Tong<sup>\*c</sup> and  
Ryan O'Hayre<sup>\*a</sup>

<sup>a</sup> Department of Metallurgical and Materials Engineering, Colorado School of Mines, 1500 Illinois St. Golden, CO 80401, USA, E-mail: rohayre@mines.edu.

<sup>b</sup> CoorsTek, 600 9th St, Golden, CO 80401.

<sup>c</sup> Department of Materials Science and Engineering, Clemson University, Clemson, South Carolina 29634, E-mail: jianhut@clemson.edu.

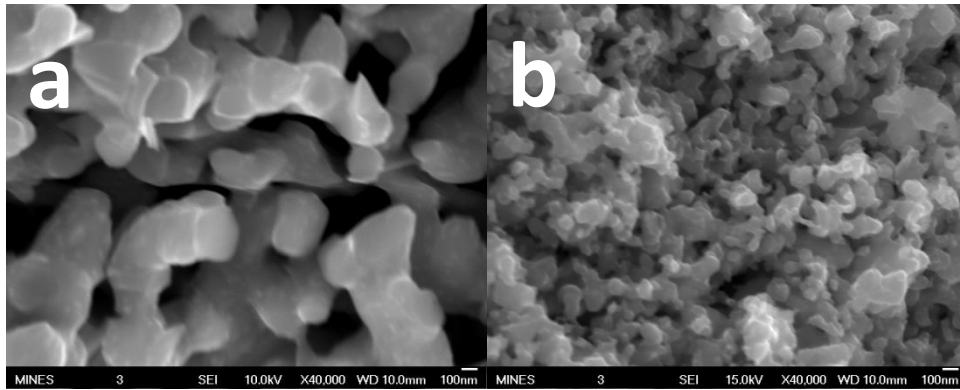

**Figure S1** (a) SEM image of BSCF symmetric cell before testing (b) SEM image of BCFZY0.1 symmetric cell before testing

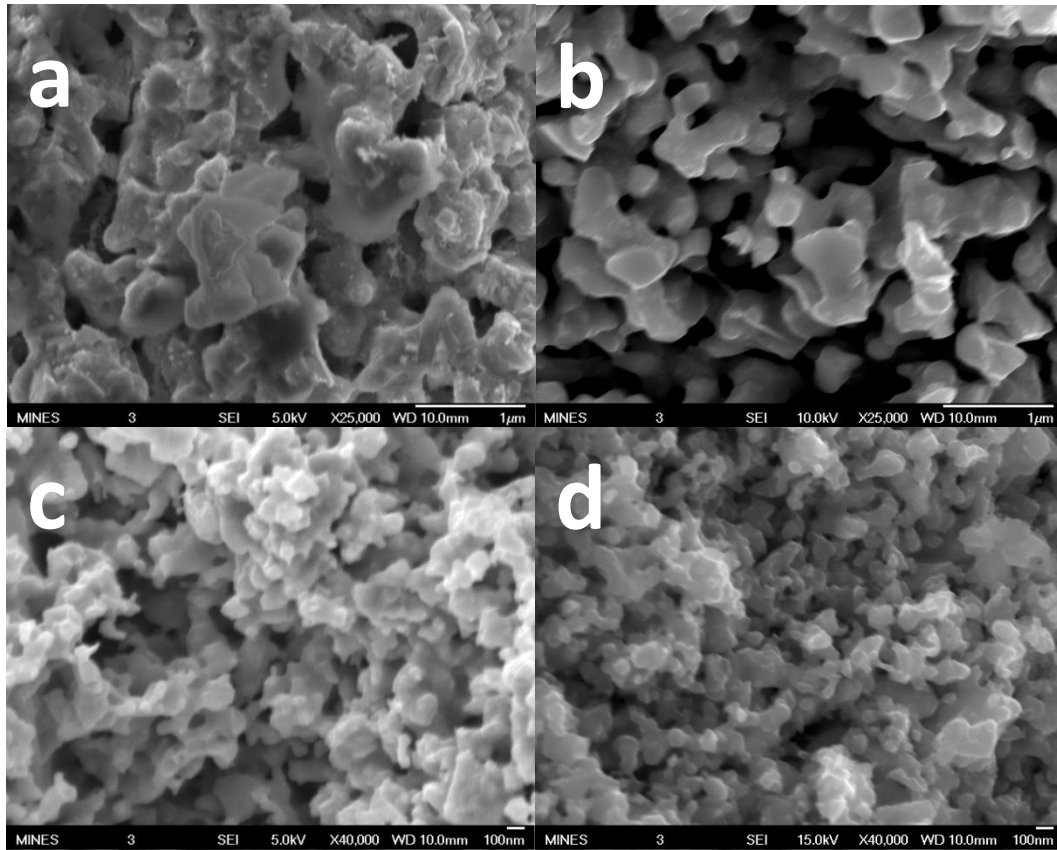

**Figure S2** (a) SEM image of BSCF symmetric cell after 720 hours operation at 350 °C under air, (b) SEM image of BSCF symmetric cell before testing, (c) SEM image of BCFZY0.1 symmetric cell after 1000 hours operation t 350 °C under air, (d) SEM image of BCFZY0.1 symmetric cell before testing.

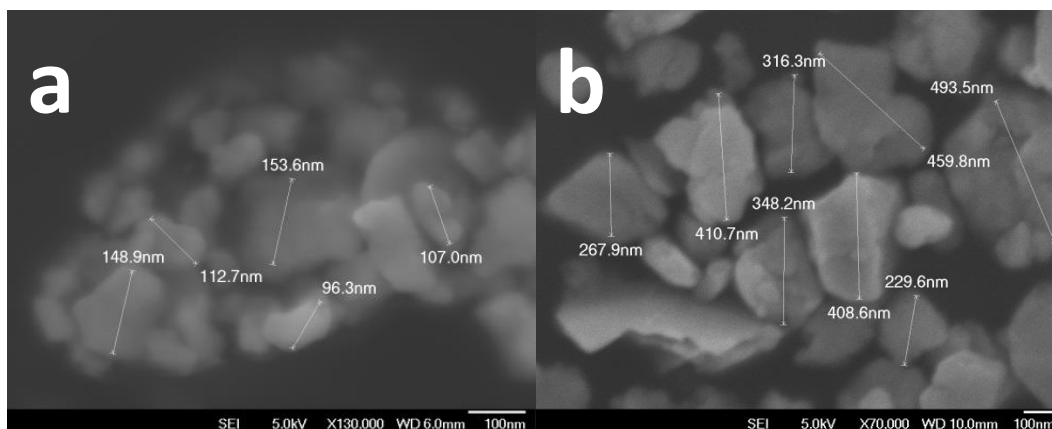

**Figure S3** (a) SEM image of BCFZY0.1 powder calcined at 900 °C for 5 hours (b) SEM image of BSCF powder calcined at 900 °C for 5 hours.

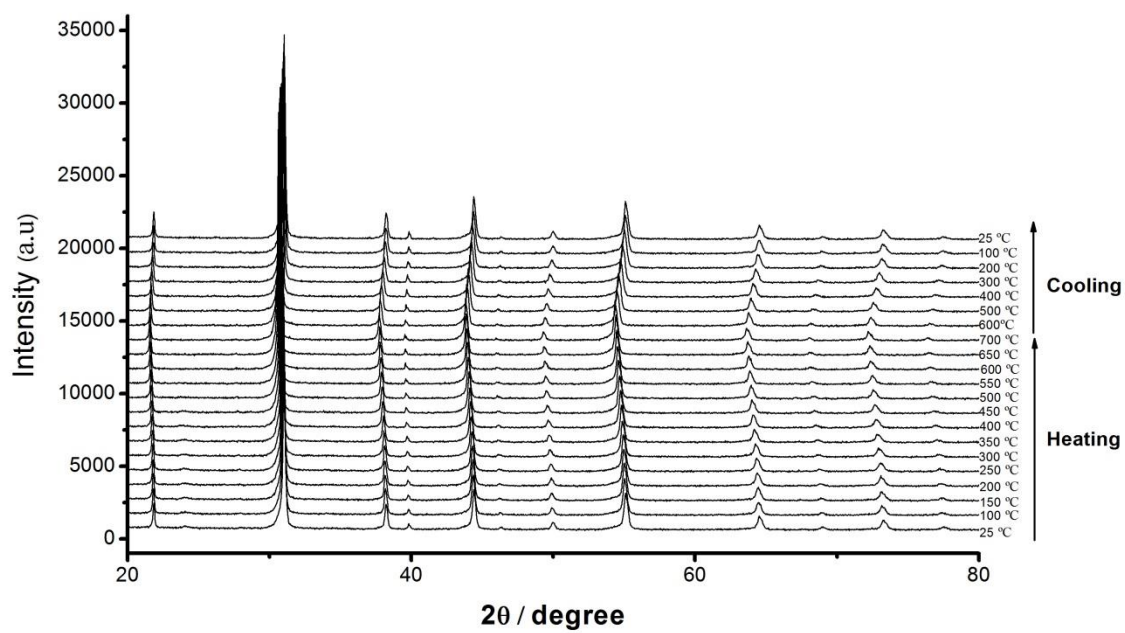

**Figure S4** XRD patterns of BCFZ under study during heating and cooling.

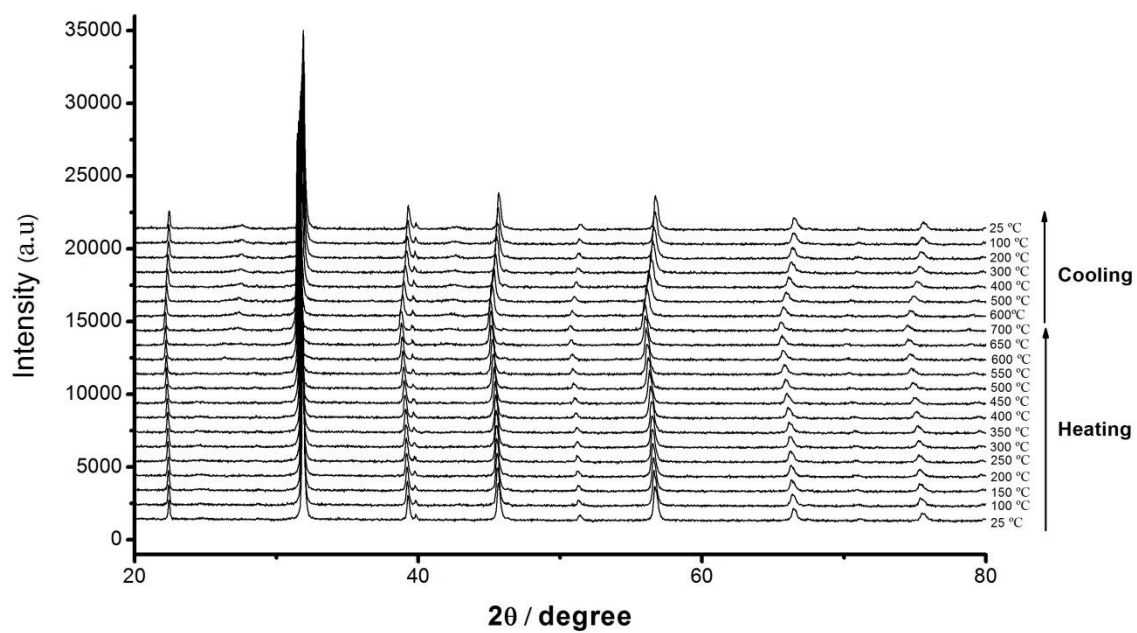

**Figure S5** XRD patterns of BSCF under study during heating and cooling.

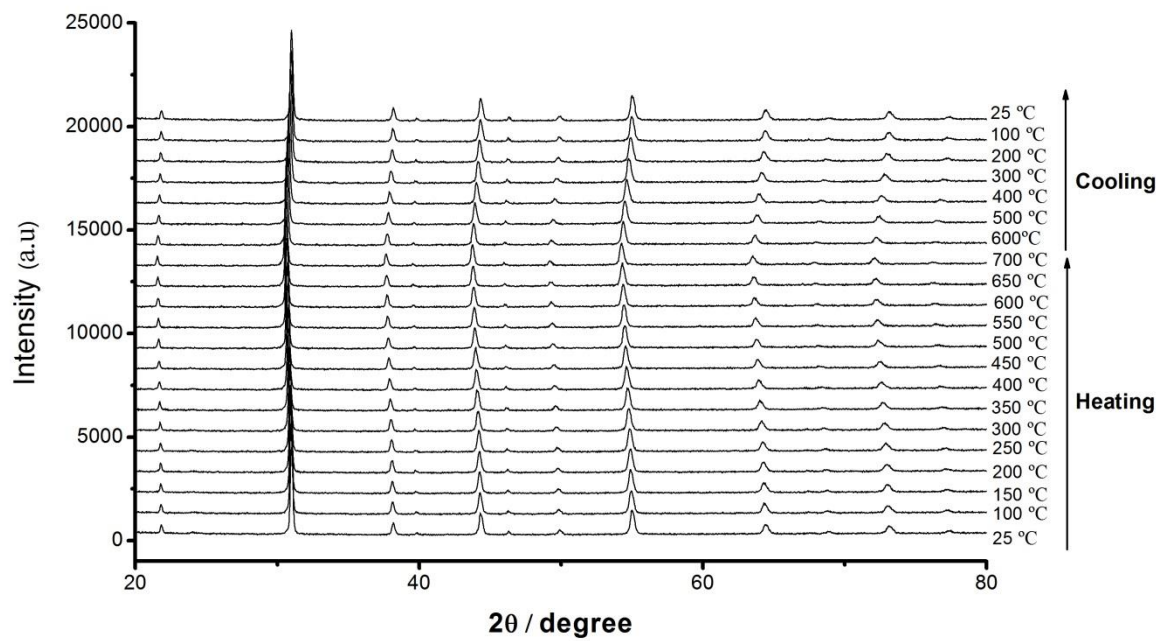

**Figure S6** XRD patterns of BCFZY0.1 under study during heating and cooling .

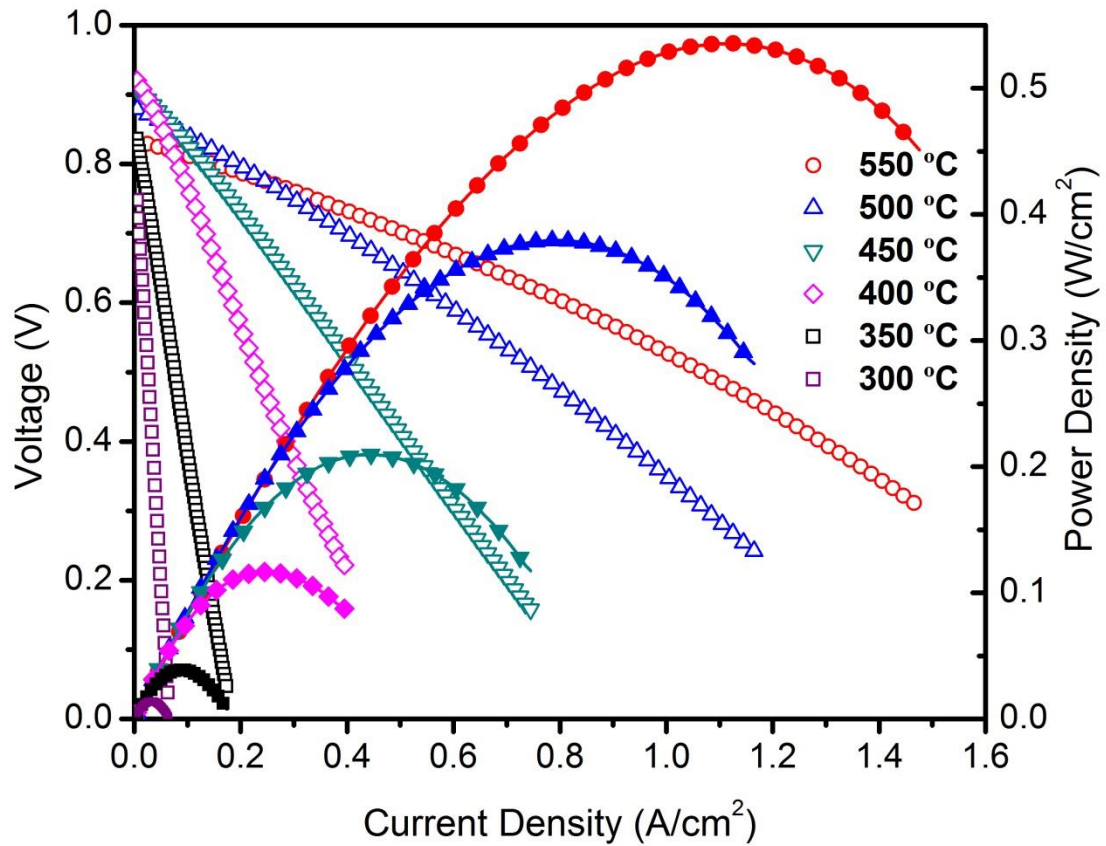

**Figure S7** I-V and corresponding I-P curves of unoptimized cell #1 with BCFZY0.1 as cathode under H<sub>2</sub>/Air at 550 °C to 300 °C.

The anode thicknesses of unoptimized cell #1 is 1.2mm while the thickness of cell #2 is 0.4 mm. The electrolyte and cathode thickness are the same.

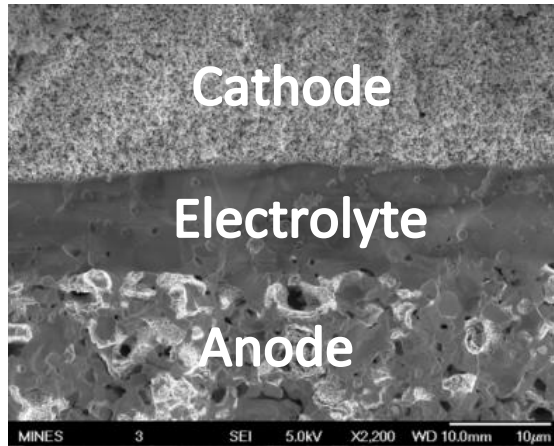

**Figure S8** Cross section SEM image of cell #2 after testing.



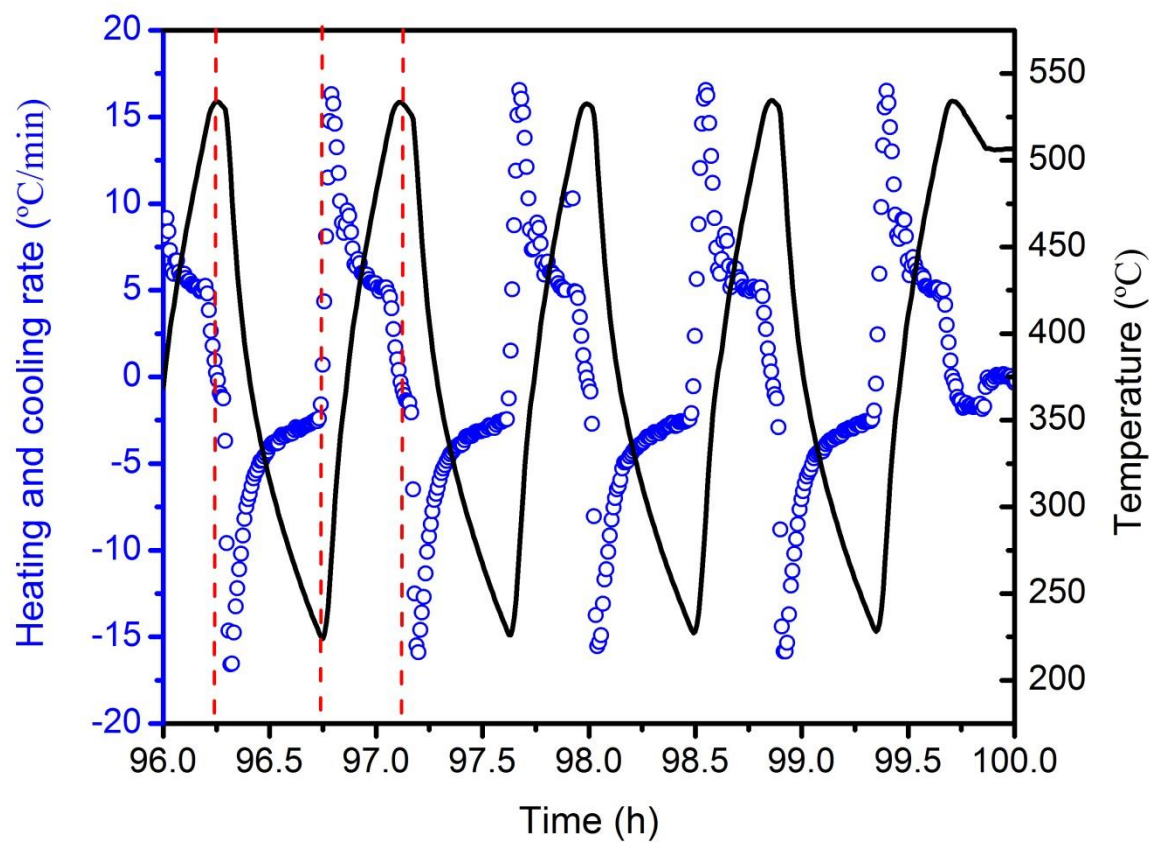

**Figure S9** Amplified temperature profile and cooling/heating rate.

**Table S1 Performance comparison for low temperature SOFCs**

| Cell composition                                                        | Measurement condition                                                  | Temperature | Peak power density (W/cm <sup>2</sup> ) | Ref.      |
|-------------------------------------------------------------------------|------------------------------------------------------------------------|-------------|-----------------------------------------|-----------|
| GDC-based LT-SOFC with BCFZY0.1 cathode                                 | H <sub>2</sub> (50mL/min) Air (150 mL/min)                             | 500 °C      | 0.97                                    | This work |
| GDC-based LT-SOFC with BCFZY0.1 cathode                                 | H <sub>2</sub> (50mL/min) Air (150 mL/min)                             | 450 °C      | 0.64                                    | This work |
| GDC-based LT-SOFC with BCFZY0.1 cathode                                 | H <sub>2</sub> (50mL/min) Air (150 mL/min)                             | 400 °C      | 0.32                                    | This work |
| GDC-based LT-SOFC with the core/shell-fibre-structured BSCF-GDC cathode | H <sub>2</sub> (60mL/min) Air (250 mL/min)                             | 500 °C      | 1.58                                    | 1         |
| GDC-based LT-SOFC with the core/shell-fibre-structured BSCF-GDC cathode | H <sub>2</sub> (60mL/min) Air (250 mL/min)                             | 450 °C      | 0.84                                    | 1         |
| GDC-based SOFC with PBSCF05-GDC composite cathode                       | H <sub>2</sub> with 3 v% H <sub>2</sub> O (100 mL/min)<br> Ambient air | 500 °C      | 0.67                                    | 2         |
| SDC-based SOFC with SNC0 .95 cathode                                    | H <sub>2</sub> (80 mL/min)<br> Ambient air                             | 500 °C      | 1.02                                    | 3         |
| SDC-based SOFC with SNC0 .95 cathode                                    | H <sub>2</sub> (80 mL/min)<br> Ambient air                             | 450 °C      | 0.66                                    | 3         |
| SDC-based SOFC with SNC0 .95 cathode                                    | H <sub>2</sub> (80 mL/min)<br> Ambient air                             | 400 °C      | 0.37                                    | 3         |
| GDC-based SOFC with LBSCF-40GDC composite cathode                       | H <sub>2</sub> (100 mL/min)<br>  air                                   | 500 °C      | 0.65                                    | 4         |
| GDC-based SOFC with B <sub>0.9</sub> CFN cathode                        | H <sub>2</sub> (80 mL/min)<br> Ambient air                             | 500 °C      | 0.42                                    | 5         |
| GDC-based SOFC with LSCF nanostructured cathode                         | H <sub>2</sub>  Oxygen                                                 | 500 °C      | 0.297                                   | 6         |
| GDC-based SOFC with LSCF nanostructured cathode                         | H <sub>2</sub>  Oxygen                                                 | 450 °C      | 0.131                                   | 6         |
| GDC-based SOFC with PBSC hollow nano fiber cathode                      | H <sub>2</sub> with 3 v% H <sub>2</sub> O<br> Ambient air              | 500 °C      | 0.62                                    | 7         |
| GDC-based SOFC with PBSC hollow nano fiber cathode                      | H <sub>2</sub> with 3 v% H <sub>2</sub> O<br> Ambient air              | 450 °C      | 0.36                                    | 7         |

**Table S2 Long-term durability comparison for BCFZY0.1 cell and other SOFCs**

| Cell composition                                                        | Measurement condition                                                     | Temperature   | Stability/degradation rate                                                                                                                                                | Ref.      |
|-------------------------------------------------------------------------|---------------------------------------------------------------------------|---------------|---------------------------------------------------------------------------------------------------------------------------------------------------------------------------|-----------|
| GDC-based LT-SOFC with BCFZY0.1 cathode                                 | H <sub>2</sub> (50mL/min)   Air (150 mL/min)                              | 500 °C/400 °C | Current density=0.4A/cm <sup>2</sup><br>Current density=0.16 A/cm <sup>2</sup><br>Current density=0.3 A/cm <sup>2</sup><br>Total 2500 hours operation without degradation | This work |
| GDC-based LT-SOFC with the core/shell-fibre-structured BSCF-GDC cathode | H <sub>2</sub> (60mL/min)   Air (250 mL/min)                              | 550 °C        | Current density=1 A/cm <sup>2</sup><br>Degradation rate=5.6% for 250 hours<br>Current density=0.5 A/cm <sup>2</sup><br>Degradation rate=0.6% for 50 hours                 | 1         |
| SOFC with nanoparticulate LSM infiltrated cathode                       | H <sub>2</sub> with 3 v% H <sub>2</sub> O   air                           | 650 °C        | Current density=0.15 A/cm <sup>2</sup><br>500 hours stable operation                                                                                                      | 8         |
| YSZ-based SOFC with LSM-YSZ nano-composite                              | H <sub>2</sub> with 3 v% H <sub>2</sub> O (200 mL/min)   Air (300 mL/min) | 800 °C        | Current density=1 A/cm <sup>2</sup><br>550 hours stable operation                                                                                                         | 9         |
| GDC-based SOFC with PBSCF05-GDC composite cathode                       | H <sub>2</sub> with 3 v% H <sub>2</sub> O (100 mL/min)   Ambient air      | 550 °C        | Constant Voltage 0.6V<br>150 hours stable operation                                                                                                                       | 2         |

- 1 J. G. Lee, J. H. Park and Y. G. Shul, *Nat. Commun.*, 2014, **5**, 4045.
- 2 S. Choi, S. Yoo, J. Kim, S. Park, A. Jun, S. Sengodan, J. Kim, J. Shin, H. Y. Jeong, Y. Choi, G. Kim and M. Liu, *Sci. Rep.*, 2013, **3**, 2426.
- 3 Y. Zhu, Z.-G. Chen, W. Zhou, S. Jiang, J. Zou and Z. Shao, *ChemSusChem*, 2013, **6**, 2249–54.
- 4 J. Kim, S. Choi, A. Jun, H. Y. Jeong, J. Shin and G. Kim, *ChemSusChem*, 2014, **7**, 1669–1675.
- 5 Z. Liu, L. Cheng and M.-F. Han, *A-site deficient Ba<sub>1-x</sub>Co<sub>0.7</sub>Fe<sub>0.2</sub>Ni<sub>0.1</sub>O<sub>3-δ</sub> cathode for intermediate temperature SOFC*, 2011, vol. 196.
- 6 C. Ding and T. Hashida, *Energy Environ. Sci.*, 2010, **3**, 1729–1731.
- 7 Y. Chen, Y. Bu, B. Zhao, Y. Zhang, D. Ding, R. Hu, T. Wei, B. Rainwater, Y. Ding, F. Chen, C. Yang, J. Liu and M. Liu, *A Durable, High-Performance Hollow-Nanofiber Cathode for Intermediate-Temperature Fuel Cells*, 2016.
- 8 T. Z. Sholklapper, V. Radmilovic, C. P. Jacobson, S. J. Visco and L. C. De Jonghe, *Electrochem. Solid-*

*State Lett.*, 2007, **10**, B74.

- 9 S.-D. Kim, H. Moon, S.-H. Hyun, J. Moon, J. Kim and H.-W. Lee, *J. Power Sources*, 2006, **163**, 392–397.
